# Supplementary material
Source: publisher site journal article supplement (https://www.dovepress.com/article/415309)
Supplement: Supplementary file 1 [file get_supplementary_file.php]

**Table S1** . Primers used in this study.

| Gene          | Name    | Sequence                      |
|---------------|---------|-------------------------------|
| AC006329.1    | FORWARD | 5'-GATCTCAATGGAAGGACACGG-3'   |
|               | REVERSE | 5'-GGGATCTGTTGCTGGAGAATTAC-3' |
| miR-127-5p    | FORWARD | 5'-GCCGAGCTGAAGCTCAGAGG-3'    |
|               | REVERSE | 5'-CTCAACTGGTGTCTGTGGA-3'     |
| SHC3          | FORWARD | 5'-TCCTTTTCAGTAGCGTCCGA-3'    |
|               | REVERSE | 5'-TGTGTGACTGCCTTCAGGTAGC-3'  |
| GAPDH         | FORWARD | 5'-GAACGGGAAGCTCACTGG-3'      |
|               | REVERSE | 5'-GCCTGCTTCACCACCTTCT-3'     |
| U6            | FORWARD | 5'-CTCGCTTCGGCAGCACATATACT-3' |
|               | REVERSE | 5'-ACGCTTCACGAATTTGCGTGTC-3'  |
| ov-AC006329.1 |         | 5'-GAATTC-3'                  |
| si-AC006329.2 |         | 5'-CCUACAAAGCAAUUCACATT-3'    |

**Table S2.** Antibodies used in the present study.

| Protein        | WB     | IHC    | IFA   | Specificity | Product code            |
|----------------|--------|--------|-------|-------------|-------------------------|
| SHC3           | 1:1000 |        |       | Rabbit      | Proteintech, 12436-1-AP |
|                |        | 1:200  |       | Rabbit      | Proteintech, 12436-1-AP |
| E-cadherin     | 1:5000 |        |       | Rabbit      | Proteintech, 20874-1-AP |
|                |        |        | 1:300 | Rabbit      | Proteintech, 20874-1-AP |
| N-cadherin     | 1:3000 |        |       | Rabbit      | Proteintech, 22018-1-AP |
|                |        | 1:2000 |       | Rabbit      | Proteintech, 22018-1-AP |
|                |        |        | 1:100 | Rabbit      | Proteintech, 22018-1-AP |
| Vimentin       | 1:3000 |        |       | Rabbit      | Proteintech, 10366-1-AP |
|                |        |        | 1:200 | Rabbit      | Proteintech, 10366-1-AP |
| Ki67           |        | 1:2000 |       | Rabbit      | Proteintech, 27309-1-AP |
| ERK1/2         | 1:1000 |        |       | Rabbit      | Proteintech, 11257-1-AP |
| p-ERK1/2       | 1:2000 |        |       | Rabbit      | Proteintech, 28733-1-AP |
| $\beta$ -actin | 1:5000 |        |       | Rabbit      | Proteintech, 81115-1-RR |
